# Supplementary material
Source: PubMed Central journal article supplement (PMC4893769)
Supplement: NIHMS771426-supplement-supp_dataset.pdf [file NIHMS771426-supplement-supp_dataset.pdf]

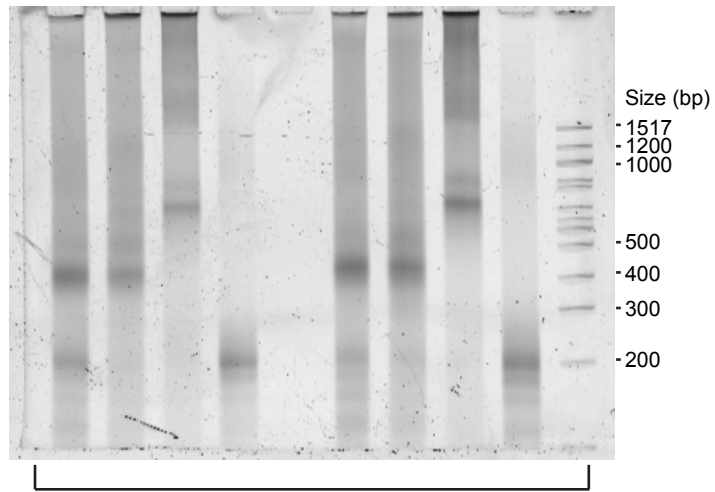

Related to Figure 1

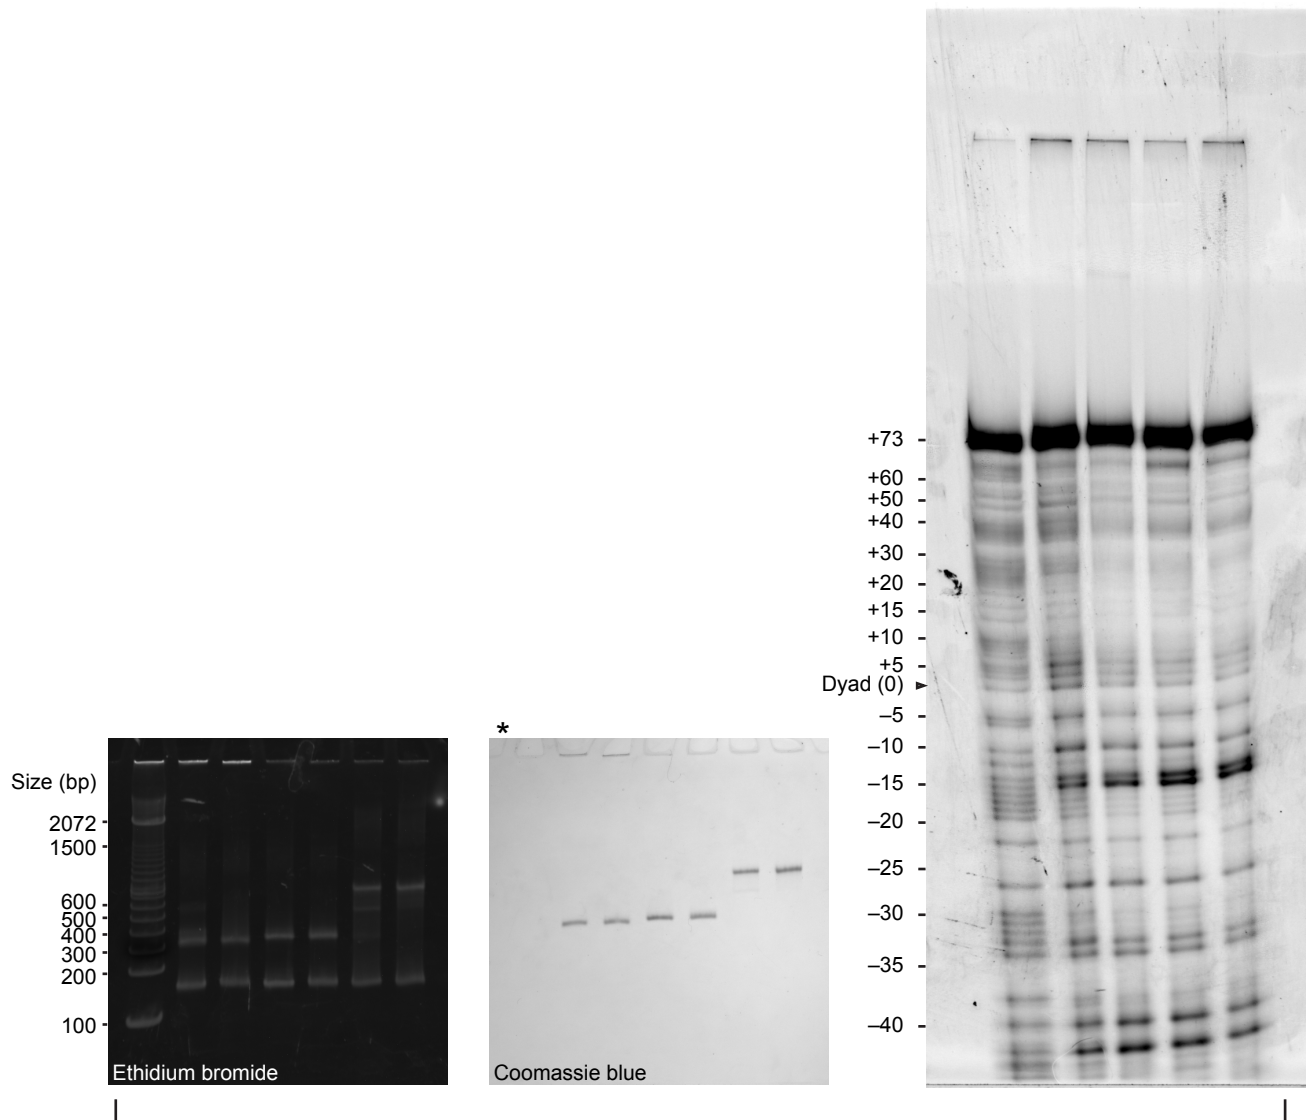

Related to Supplementary Fig. 3

\*Due to the nature of native PAGE, only a DNA ladder is loaded. Coomassie blue staining is to detect the presence of proteins only.
