# Supplementary material
Source: PubMed Central journal article supplement (PMC4893769)
Supplement: NIHMS771426-supplement-supp_table1.pdf [file NIHMS771426-supplement-supp_table1.pdf]

|             | H3 nucleosomes |                |           |                | CENP-A nucleosomes |                |           |                | CENP-A + CENP-C <sup>CD</sup> nucleosomes |                |           |                |
|-------------|----------------|----------------|-----------|----------------|--------------------|----------------|-----------|----------------|-------------------------------------------|----------------|-----------|----------------|
|             | DNA1           |                | DNA2      |                | DNA1               |                | DNA2      |                | DNA1                                      |                | DNA2      |                |
|             | Count (N)      | Percentage (%) | Count (N) | Percentage (%) | Count (N)          | Percentage (%) | Count (N) | Percentage (%) | Count (N)                                 | Percentage (%) | Count (N) | Percentage (%) |
| Low FRET    | 68             | 15.2           | 60        | 18.1           | 44                 | 14.5           | 58        | 10             | 35                                        | 5.7            | 25        | 9.2            |
| Medium FRET | 129            | 29             | 143       | 43.2           | 103                | 33.9           | 209       | 36.1           | 226                                       | 36.7           | 102       | 37.5           |
| High FRET   | 249            | 55.8           | 128       | 38.7           | 157                | 51.6           | 312       | 53.9           | 355                                       | 57.6           | 145       | 53.3           |
| Total       | 446            | 100            | 331       | 100            | 304                | 100            | 579       | 100            | 616                                       | 100            | 272       | 100            |

**Supplementary Table 1. Summary of the different  $\phi_{\text{FRET}}$  groups observed in smFRET measurements.** The number and percentage of the nucleosomes analyzed in this study binned into the low, medium, and high  $\phi_{\text{FRET}}$  groups (Fig. 1 and Supplementary Fig. 1).
